# Supplementary material for: Phase 1 study of safety, tolerability and immunogenicity of the human telomerase (hTERT)-encoded DNA plasmids INO-1400 and INO-1401 with or without IL-12 DNA plasmid INO-9012 in adult patients with solid tumors
Source: PubMed Central journal article supplement — J Immunother Cancer. 2021 Jul 6;9(7):e003019. doi: 10.1136/jitc-2021-003019 (PMC8261871; doi:10.1136/jitc-2021-003019), 2021-07-06
Supplement: jitc-2021-003019supp001.pdf [file jitc-2021-003019supp001.pdf]

**SUPPLEMENTARY DATA**

| <b>Treatment Arm</b> | <b>INO-1400 Dose (mg)</b> | <b>INO-1401 Dose (mg)</b> | <b>INO-9012 Dose (mg)</b> |
|----------------------|---------------------------|---------------------------|---------------------------|
| 1                    | 2.0                       |                           |                           |
| 2                    | 8.0                       |                           |                           |
| 3                    | 2.0                       |                           | 0.5                       |
| 4                    | 2.0                       |                           | 2.0                       |
| 5                    | 8.0                       |                           | 0.5                       |
| 6                    | 8.0                       |                           | 2.0                       |
| 7                    |                           | 2.0                       |                           |
| 8                    |                           | 8.0                       |                           |
| 9                    |                           | 8.0                       | 0.5                       |
| 10                   |                           | 8.0                       | 2.0                       |

**Supplementary Table 1-** Study treatment arms

|       |       | Tumor Type |      |            |        |         |     |            |     |         |
|-------|-------|------------|------|------------|--------|---------|-----|------------|-----|---------|
|       |       | Pancreatic | Lung | Colorectal | Breast | Ovarian | H&N | Esophageal | HCC | Gastric |
| STAGE | I     |            |      |            |        |         |     |            | 1   |         |
|       | IB    | 3          | 1    |            |        |         |     |            |     |         |
|       | II    |            | 1    |            |        |         |     |            | 1   |         |
|       | IIA   | 5          | 1    |            | 4      |         |     |            |     |         |
|       | IIB   | 20         | 3    |            | 3      |         |     |            |     |         |
|       | III   | 5          |      | 6          | 1      |         |     |            |     |         |
|       | IIIA  |            | 7    |            |        | 1       |     | 1          |     | 1       |
|       | IIIB  |            |      | 1          |        | 2       |     | 1          |     |         |
|       | IIIC  |            |      | 2          | 2      | 4       |     |            |     |         |
|       | IV    | 1          | 1    | 5          |        | 1       |     |            |     |         |
|       | IVA   |            |      | 4          |        |         | 2   |            |     |         |
|       | IVB   |            |      |            |        | 1       | 1   |            |     |         |
|       | TOTAL | 34         | 14   | 18         | 10     | 9       | 3   | 2          | 2   | 1       |

**Supplementary Table 2-** Study demographics by disease and stage

| System Organ Class                              | Subject Count (%) by Severity Grade |           |
|-------------------------------------------------|-------------------------------------|-----------|
|                                                 | Grade 3                             | Grade 4   |
| Preferred Term                                  |                                     |           |
| Any adverse events                              | 15 ( 16.1%)                         | 1 ( 1.1%) |
| Blood and lymphatic system disorders            | 1 ( 1.1%)                           | 0 ( 0.0%) |
| <i>Leukocytosis</i>                             | 1 ( 1.1%)                           | 0 ( 0.0%) |
| Cardiac disorders                               | 1 ( 1.1%)                           | 0 ( 0.0%) |
| <i>Acute coronary syndrome</i>                  | 1 ( 1.1%)                           | 0 ( 0.0%) |
| Gastrointestinal disorders                      | 5 ( 5.4%)                           | 0 ( 0.0%) |
| <i>Abdominal pain</i>                           | 1 ( 1.1%)                           | 0 ( 0.0%) |
| <i>Ascites</i>                                  | 1 ( 1.1%)                           | 0 ( 0.0%) |
| <i>Diarrhoea</i>                                | 1 ( 1.1%)                           | 0 ( 0.0%) |
| <i>Ileus</i>                                    | 1 ( 1.1%)                           | 0 ( 0.0%) |
| <i>Mouth haemorrhage</i>                        | 1 ( 1.1%)                           | 0 ( 0.0%) |
| <i>Obstruction gastric</i>                      | 1 ( 1.1%)                           | 0 ( 0.0%) |
| Hepatobiliary disorders                         | 1 ( 1.1%)                           | 0 ( 0.0%) |
| <i>Bile duct obstruction</i>                    | 1 ( 1.1%)                           | 0 ( 0.0%) |
| Infections and infestations                     | 4 ( 4.3%)                           | 1 ( 1.1%) |
| <i>Breast cellulitis</i>                        | 1 ( 1.1%)                           | 0 ( 0.0%) |
| <i>Cellulitis</i>                               | 2 ( 2.2%)                           | 0 ( 0.0%) |
| <i>Clostridium difficile colitis</i>            | 1 ( 1.1%)                           | 0 ( 0.0%) |
| <i>Pneumonia</i>                                | 1 ( 1.1%)                           | 0 ( 0.0%) |
| <i>Sepsis</i>                                   | 0 ( 0.0%)                           | 1 ( 1.1%) |
| Injury, poisoning and procedural complications  | 3 ( 3.2%)                           | 0 ( 0.0%) |
| <i>Fall</i>                                     | 1 ( 1.1%)                           | 0 ( 0.0%) |
| <i>Incisional hernia</i>                        | 1 ( 1.1%)                           | 0 ( 0.0%) |
| <i>Wound complication</i>                       | 1 ( 1.1%)                           | 0 ( 0.0%) |
| Investigations                                  | 1 ( 1.1%)                           | 0 ( 0.0%) |
| <i>Lipase increased</i>                         | 1 ( 1.1%)                           | 0 ( 0.0%) |
| Musculoskeletal and connective tissue disorders | 1 ( 1.1%)                           | 0 ( 0.0%) |
| <i>Osteoarthritis</i>                           | 1 ( 1.1%)                           | 0 ( 0.0%) |
| Renal and urinary disorders                     | 1 ( 1.1%)                           | 0 ( 0.0%) |
| <i>Hydronephrosis</i>                           | 1 ( 1.1%)                           | 0 ( 0.0%) |
| Skin and subcutaneous tissue disorders          | 1 ( 1.1%)                           | 0 ( 0.0%) |
| <i>Rash maculo-papular</i>                      | 1 ( 1.1%)                           | 0 ( 0.0%) |
| Vascular disorders                              | 1 ( 1.1%)                           | 0 ( 0.0%) |
| <i>Hypertension</i>                             | 1 ( 1.1%)                           | 0 ( 0.0%) |

**Supplementary Table 3-** Summary of Grade 3-4 Adverse Events (mITT population, N=93)

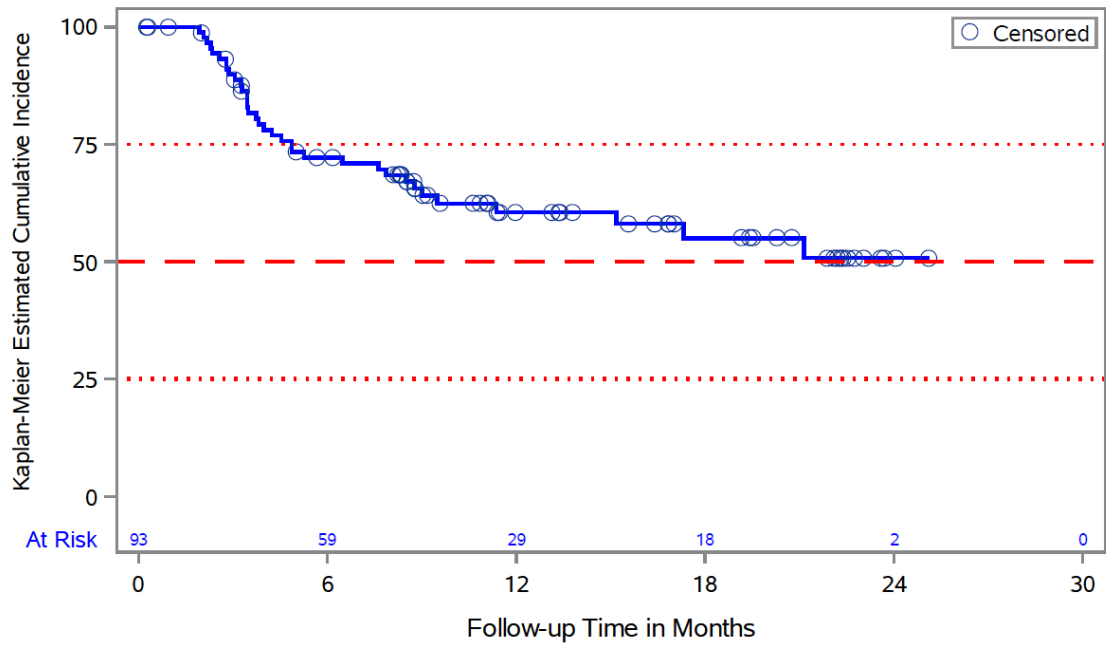

**Supplementary Figure 1-** Kaplan-Meier Analysis of Disease-Free Survival Across All Treatment Arms (mITT population, N=93)

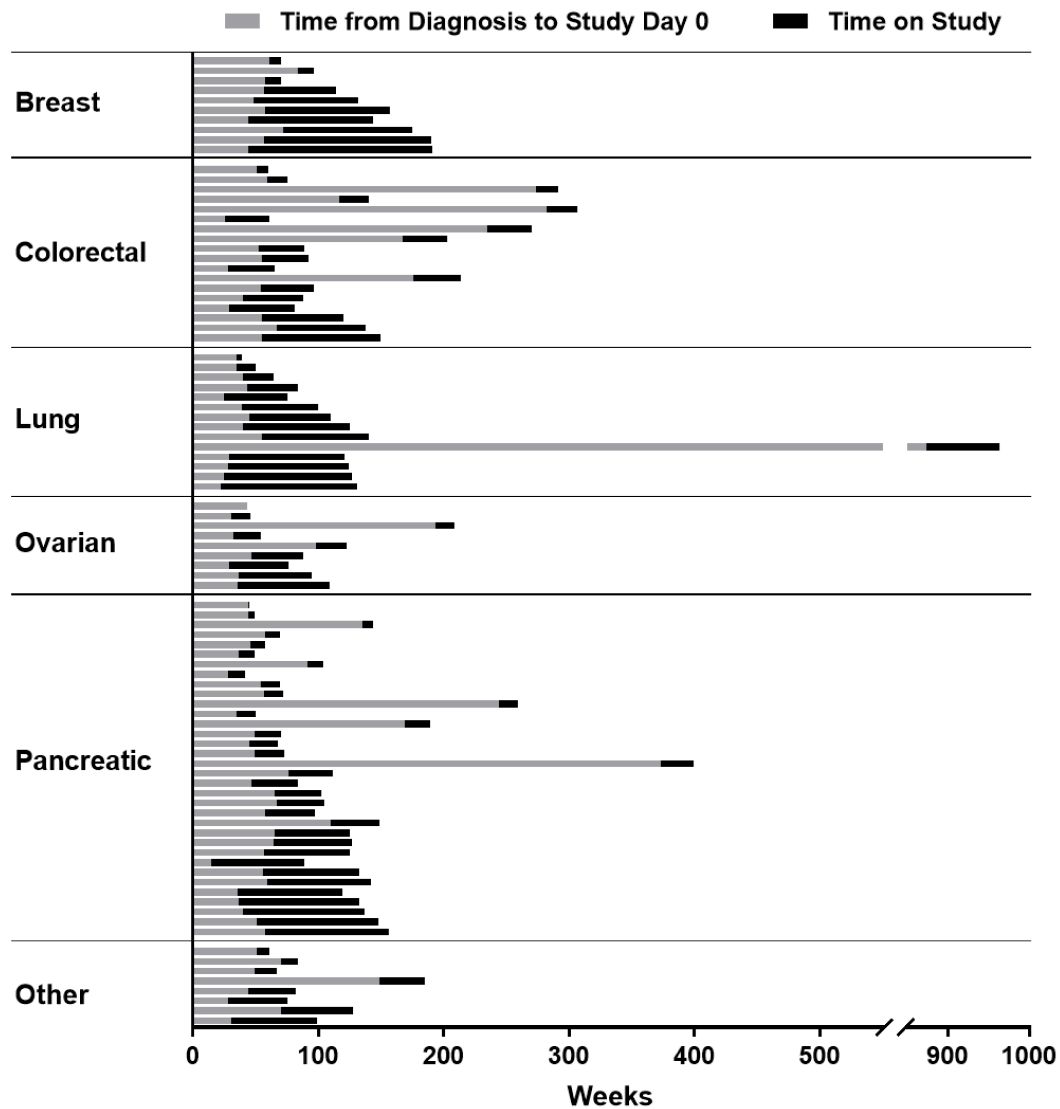

**Supplementary Figure 2-** Time on Study from Diagnosis and from Day 0 (black bar) by Tumor Type (N=93)

A

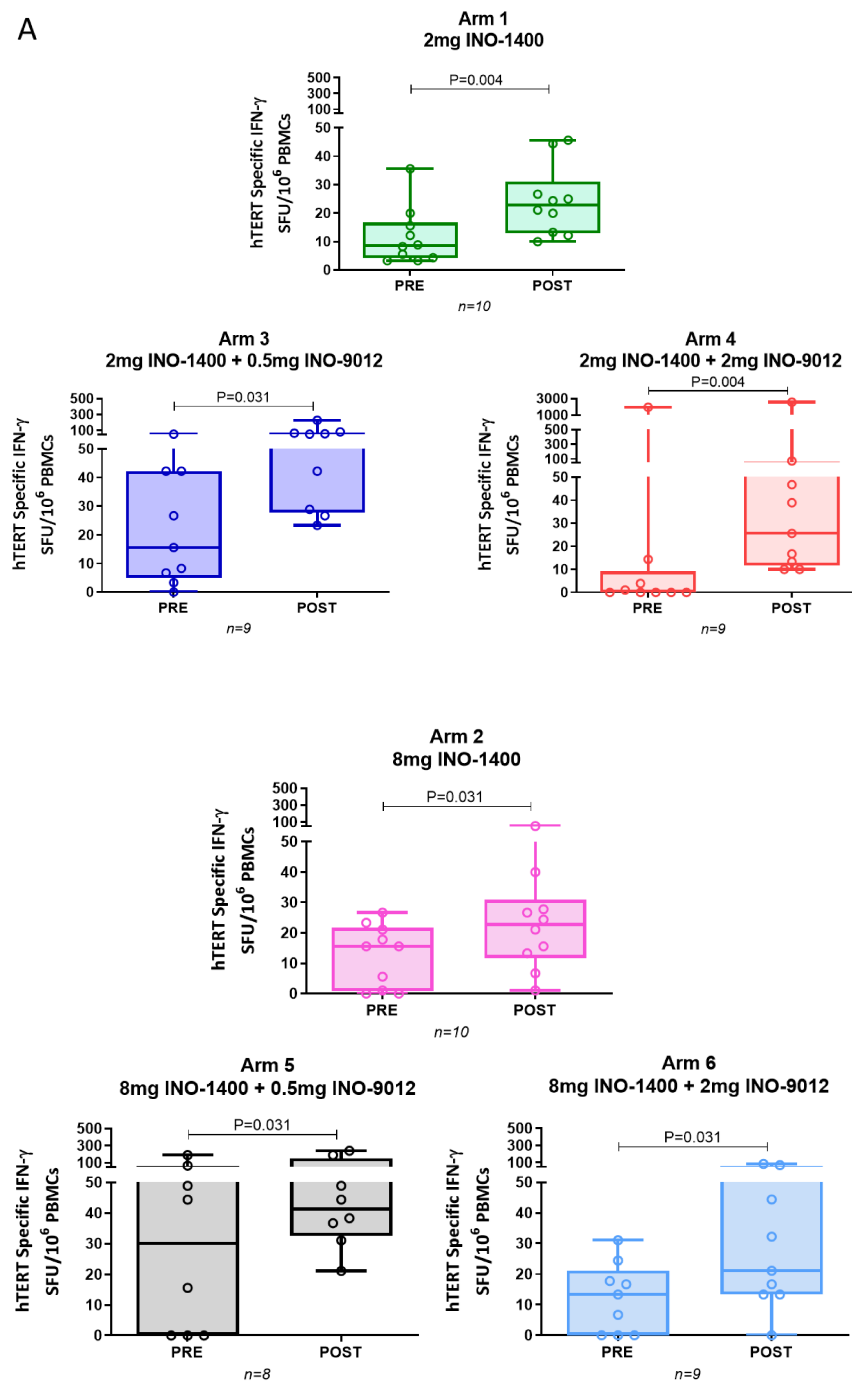

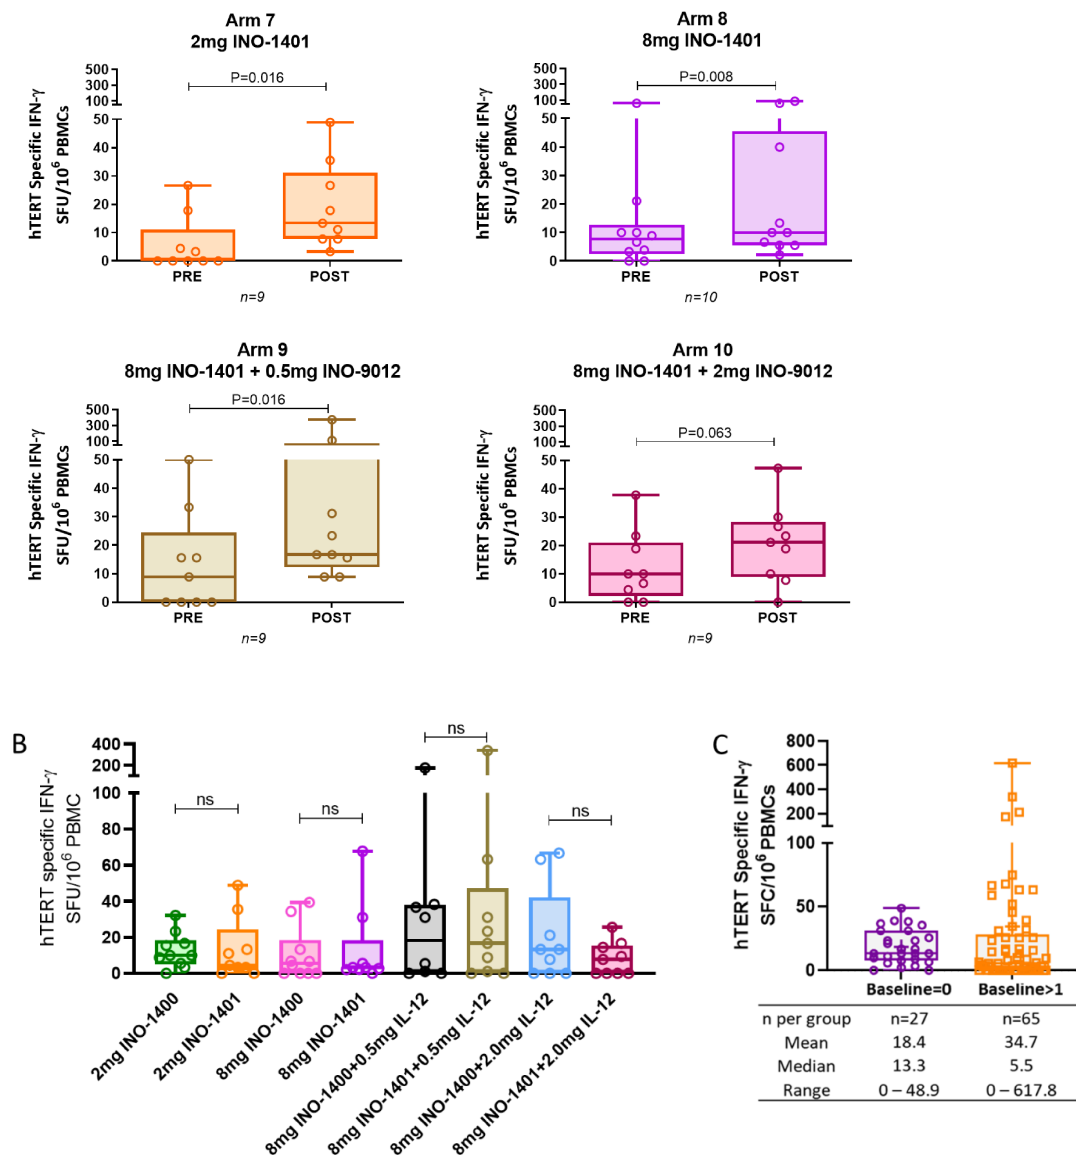

**Supplementary Figure 3- IFN- $\gamma$  ELISpot responses broken out by study treatment arm.** Open symbols represent individual patients, the box extends from the 25<sup>th</sup> to the 75<sup>th</sup> percentile, line inside the box is a the median, and the whiskers extend from the minimum to maximum values. A) Wilcoxon signs rank test was used to assess significance between the magnitude of IFN-g in patients before (PRE) and after (POST) immunotherapy. The number of patients in each group is displayed below the graph, n. B) The increase over baseline is shown for each group. Wilcoxon ranked sum test was used to assess significance of the increase over baseline between treatment groups. C) The increase over baseline is shown for subjects who have no hTERT specific IFN-g

detected by ELISpot at baseline (Baseline=0) or who had a detectable magnitude of hTERT specific IFN-g detected by ELISpot at baseline (Baseline>1).



| <b>Clinical Status of Pancreatic Cancer Subjects</b> |                   |                                                    |                              |
|------------------------------------------------------|-------------------|----------------------------------------------------|------------------------------|
|                                                      | <b>Alive, NED</b> | <b>Alive, Progressed or Disease Status Unknown</b> | <b>Deceased with Disease</b> |
| Subject ID                                           | 51018             | 51047                                              | 51050                        |
|                                                      | 51021             | 51057                                              | 51019                        |
|                                                      | 51010             | 51017                                              | 51061                        |
|                                                      | 51059             | 51067                                              | 51045                        |
|                                                      | 51051             | 51052                                              | 51042                        |
|                                                      | 51037             | 51040                                              | 51060                        |
|                                                      | 51029             | 51034                                              |                              |
|                                                      | 51028             |                                                    |                              |
|                                                      | 51013             |                                                    |                              |
|                                                      | 51002             |                                                    |                              |

**Supplementary Table 4-** Clinical status as of the date of last contact of the subset of pancreatic cancer patients with long-term follow up
